# Supplementary material
Source: PubMed Central journal article supplement (PMC7939019)
Supplement: NIHMS1626790-supplement-1.pdf [file NIHMS1626790-supplement-1.pdf]

**Appendix**  
**Closed-Loop eReferral From Primary Care Clinics to a State Tobacco-Cessation Quitline: Effects Using Real-World Implementation Training**  
**Baker et al.**

**Appendix Table 1.** Clinic Size, Visit Volume, Smoker Demographics, Percentages Assessed for Quitting, Interest, Readiness, eReferral, and Service Acceptance

| Clinic | Adult panel    | Clinician count | Smoker visits | % Women | % African American | % Other minority | % Hispanic | % Medicare | % Medicaid | % Uninsured | Mean age | % Assessed | % Ready to quit | % eReferred | % WTQL Accepted services |
|--------|----------------|-----------------|---------------|---------|--------------------|------------------|------------|------------|------------|-------------|----------|------------|-----------------|-------------|--------------------------|
| 1      | 4,043          | 2               | 953           | 52.5    | 1.3                | 0.6              | 0.7        | 37.7       | 21.4       | 3.5         | 52.6     | 88.8       | 21.8            | 8.0         | 3.8                      |
| 2      | 9,295          | 5               | 1,056         | 54.1    | 2.0                | 0.7              | 1.9        | 23.6       | 14.9       | 4.4         | 49.1     | 93.8       | 19.3            | 6.0         | 2.2                      |
| 3      | 2,902          | 4               | 636           | 51.3    | 0.3                | 0.0              | 0.9        | 41.5       | 10.2       | 4.9         | 54.5     | 97.2       | 25.0            | 5.3         | 2.2                      |
| 4      | 5,295          | 3               | 597           | 53.1    | 2.7                | 1.3              | 1.0        | 22.3       | 15.1       | 2.7         | 47.2     | 92.0       | 20.8            | 11.2        | 2.9                      |
| 5      | 10,842         | 22              | 1,860         | 58.0    | 23.0               | 4.2              | 3.0        | 29.2       | 24.1       | 5.1         | 47.3     | 73.0       | 11.4            | 3.0         | 0.9                      |
| 6      | 14,073         | 25              | 1,000         | 62.2    | 6.1                | 4.7              | 2.9        | 22.9       | 14.1       | 6.9         | 48.7     | 93.5       | 19.5            | 5.3         | 1.3                      |
| 7      | 9,662          | 5               | 441           | 45.4    | 12.5               | 1.1              | 3.4        | 37.9       | 11.6       | 4.3         | 53.6     | 88.4       | 21.8            | 7.9         | 2.0                      |
| 8      | 8,589          | 5               | 581           | 55.9    | 13.9               | 3.8              | 2.9        | 36.0       | 19.8       | 5.2         | 51.1     | 92.8       | 17.9            | 7.2         | 1.9                      |
| 9      | — <sup>a</sup> | —               | 240           | 47.1    | 16.3               | 3.8              | 5.4        | 11.7       | 26.7       | 8.8         | 39.7     | 90.0       | 35.8            | 10.0        | 3.3                      |
| 10     | 9,992          | 6               | 605           | 59.5    | 15.0               | 3.1              | 3.8        | 35.0       | 16.2       | 3.1         | 52.6     | 84.8       | 19.7            | 5.0         | 1.0                      |
| 11     | 10,099         | 11              | 1,013         | 55.2    | 14.1               | 2.0              | 2.8        | 24.9       | 19.0       | 4.1         | 50.6     | 94.9       | 19.2            | 5.4         | 2.3                      |
| 12     | 6,960          | 4               | 733           | 55.0    | 1.2                | 0.3              | 1.6        | 26.5       | 9.4        | 6.8         | 52.5     | 94.8       | 27.0            | 5.3         | 1.4                      |
| 13     | 6,450          | 3               | 521           | 55.7    | 2.5                | 1.0              | 2.1        | 22.5       | 9.2        | 2.5         | 48.3     | 92.3       | 31.5            | 5.6         | 2.7                      |
| 14     | 14,235         | 6               | 1,260         | 58.7    | 7.9                | 2.4              | 1.3        | 14.7       | 13.4       | 6.1         | 44.9     | 93.0       | 22.4            | 7.9         | 1.7                      |
| 15     | 5,315          | 3               | 477           | 52.4    | 1.0                | 0.4              | 2.3        | 16.6       | 10.3       | 4.6         | 49.8     | 88.9       | 18.9            | 4.4         | 1.7                      |
| 16     | 4,724          | 3               | 395           | 55.7    | 0.8                | 1.3              | 0.5        | 15.2       | 13.7       | 5.3         | 46.6     | 89.9       | 24.3            | 5.6         | 0.8                      |
| 17     | 5,344          | 3               | 426           | 68.3    | 17.8               | 1.6              | 6.1        | 15.0       | 21.6       | 4.7         | 43.5     | 82.4       | 11.5            | 3.1         | 0.9                      |
| 18     | 17,437         | 12              | 1,117         | 54.3    | 12.9               | 3.0              | 1.9        | 25.3       | 15.8       | 4.1         | 48.3     | 84.4       | 21.4            | 8.3         | 2.8                      |
| 19     | 5,060          | 3               | 451           | 52.8    | 24.8               | 4.9              | 4.4        | 20.6       | 33.0       | 2.4         | 44.8     | 89.1       | 35.9            | 10.0        | 3.6                      |
| 20     | 20,791         | 23              | 889           | 47.2    | 8.0                | 2.8              | 2.7        | 30.9       | 12.0       | 1.9         | 53.2     | 85.4       | 28.2            | 4.7         | 1.5                      |
| 21     | 8,623          | 6               | 367           | 94.8    | 14.4               | 0.8              | 1.4        | 32.2       | 17.7       | 1.9         | 50.7     | 75.5       | 30.2            | 5.2         | 2.7                      |
| 22     | 10,459         | 15              | 976           | 62.5    | 10.5               | 2.8              | 1.4        | 38.7       | 16.0       | 1.4         | 49.8     | 79.5       | 35.5            | 6.6         | 1.7                      |
| 23     | 13,066         | 30              | 535           | 44.5    | 19.3               | 3.7              | 2.6        | 35.1       | 13.5       | 5.0         | 49.6     | 82.2       | 19.1            | 4.1         | 1.1                      |
| 24     | 4,002          | 3               | 630           | 60.6    | 2.4                | 1.1              | 1.0        | 17.0       | 11.6       | 3.3         | 48.0     | 94.6       | 18.3            | 6.2         | 3.0                      |
| 25     | 2,734          | 1               | 252           | 51.6    | 3.6                | 0.8              | 1.6        | 21.8       | 19.8       | 5.6         | 48.8     | 94.4       | 31.0            | 13.9        | 4.0                      |
| 26     | 6,925          | 6               | 520           | 59.8    | 19.8               | 3.1              | 4.2        | 16.0       | 27.1       | 3.7         | 43.5     | 78.3       | 19.0            | 4.4         | 1.4                      |
| 27     | 15,256         | 8               | 1,419         | 56.2    | 1.0                | 0.8              | 2.1        | 17.9       | 14.4       | 5.0         | 47.3     | 92.0       | 27.8            | 7.8         | 2.0                      |
| 28     | 6,234          | 14              | 928           | 54.0    | 1.4                | 1.4              | 0.8        | 19.6       | 15.4       | 4.8         | 47.6     | 90.6       | 15.1            | 8.7         | 2.5                      |
| 29     | — <sup>b</sup> | 1               | 58            | 72.4    | 1.7                | 0.0              | 0.0        | 46.6       | 5.2        | 0.0         | 60.7     | 58.6       | 10.3            | 10.3        | 3.5                      |
| 30     | 8,780          | 21              | 1,949         | 58.0    | 37.6               | 5.1              | 10.3       | 21.1       | 40.0       | 13.3        | 45.6     | 83.5       | 19.6            | 4.5         | 0.9                      |

<sup>a</sup>This is a clinic that serves patients new to the system who have not yet selected a primary care provider at another clinic; it does not have a stable panel of patients or primary care providers.

<sup>b</sup>Data on adult panel size were not provided for this small clinic, which has closed.

**Appendix**  
**Closed-Loop eReferral From Primary Care Clinics to a State Tobacco-Cessation Quitline: Effects Using Real-World Implementation Training**  
**Baker et al.**

WTQL, Wisconsin Tobacco Quitline; eReferral=electronic referral.

## **APPENDIX TEXT**

This section describes the specific cascade of steps involved in the use of the electronic health record (EHR)-enabled tobacco intervention resource and the logic behind alerting. Note that below we have not used proprietary language that is specific to the EHR vendor. The steps are as follows:

- 1) Previously recorded tobacco use status for the patient is displayed in the vital sign assessment section of the EHR. MAs/LPNs or others conducting rooming activities are instructed to verify this tobacco use status. If it needs to be updated, staff click a link to go to the tobacco use history part of the social history to enter the current tobacco use status.
- 2) The vital sign section of the EHR presents a yes/no field for “Ready to Quit?” that MAs/LPNs (roomers) are directed to complete at every visit with a patient who uses any form of tobacco other than exclusive use of ENDS. The readiness to quit field is not prepopulated based on previous response as tobacco use status is.
- 3) If “Ready to Quit?” is not documented (yes or no), when the roomer tries to move to another section in the EHR, a pop-up appears that prompts readiness to quit assessment and requires that an “ok” box be clicked and readiness documented.
- 4) Documentation of positive readiness to quit in the vital sign alert section presents a tobacco cessation alert with an option for recording the patient’s interest in quitline referral (or lack thereof). This alert will appear in a list of practice recommendations pertinent to the encounter only for patients age 18 or older who smoke or use smokeless

**Appendix**  
**Closed-Loop eReferral From Primary Care Clinics to a State Tobacco-Cessation Quitline: Effects Using**  
**Real-World Implementation Training**  
**Baker et al.**

tobacco, and who have an address in Wisconsin. The alert is suppressed for 90 days after a response is last documented in this alert for the patient.

- 5) Opening an order set associated with the tobacco cessation alert presents a tobacco cessation hyperlink that cues the roomer to confirm the patient's interest in quitline referral and to record the best time for the quitline to call the patient.
- 6) The roomer's pending the order set stages it for the patient's physician to review and sign. Once signed in the EHR, it is transmitted to the quitline via HL7v2 (a form of HIPAA-compliant transmission to the quitline), which activates quitline calls.
- 7) The quitline then sends the referral results (feedback) to the healthcare system's EHR, reporting the outcomes of referral (contact and service delivery); this is returned to the referring provider's EHR inbox in a results folder, and is appended to the patient's chart as the result of a consultation order, for all members of a patient's care team to see. The result notes if/when the patient was contacted, what the call disposition was (e.g., unreached, enrolled in one-call program), any medications dispensed (e.g., 21 mg patches, 2 weeks), and a target quit date (if set).
- 8) Healthcare system staff then call the patient to see if s/he desires more medication; if so, nicotine replacement is added to the patient's medication list.
